# Supplementary material for: Fructose, insulin resistance, and metabolic dyslipidemia
Source: Springer Nature journal article supplement (doi:10.1186/1743-7075-2-5), 2005-02-21
Supplement: 12986_2005_21_MOESM2_ESM.pdf [file 12986_2005_21_MOESM2_ESM.pdf]

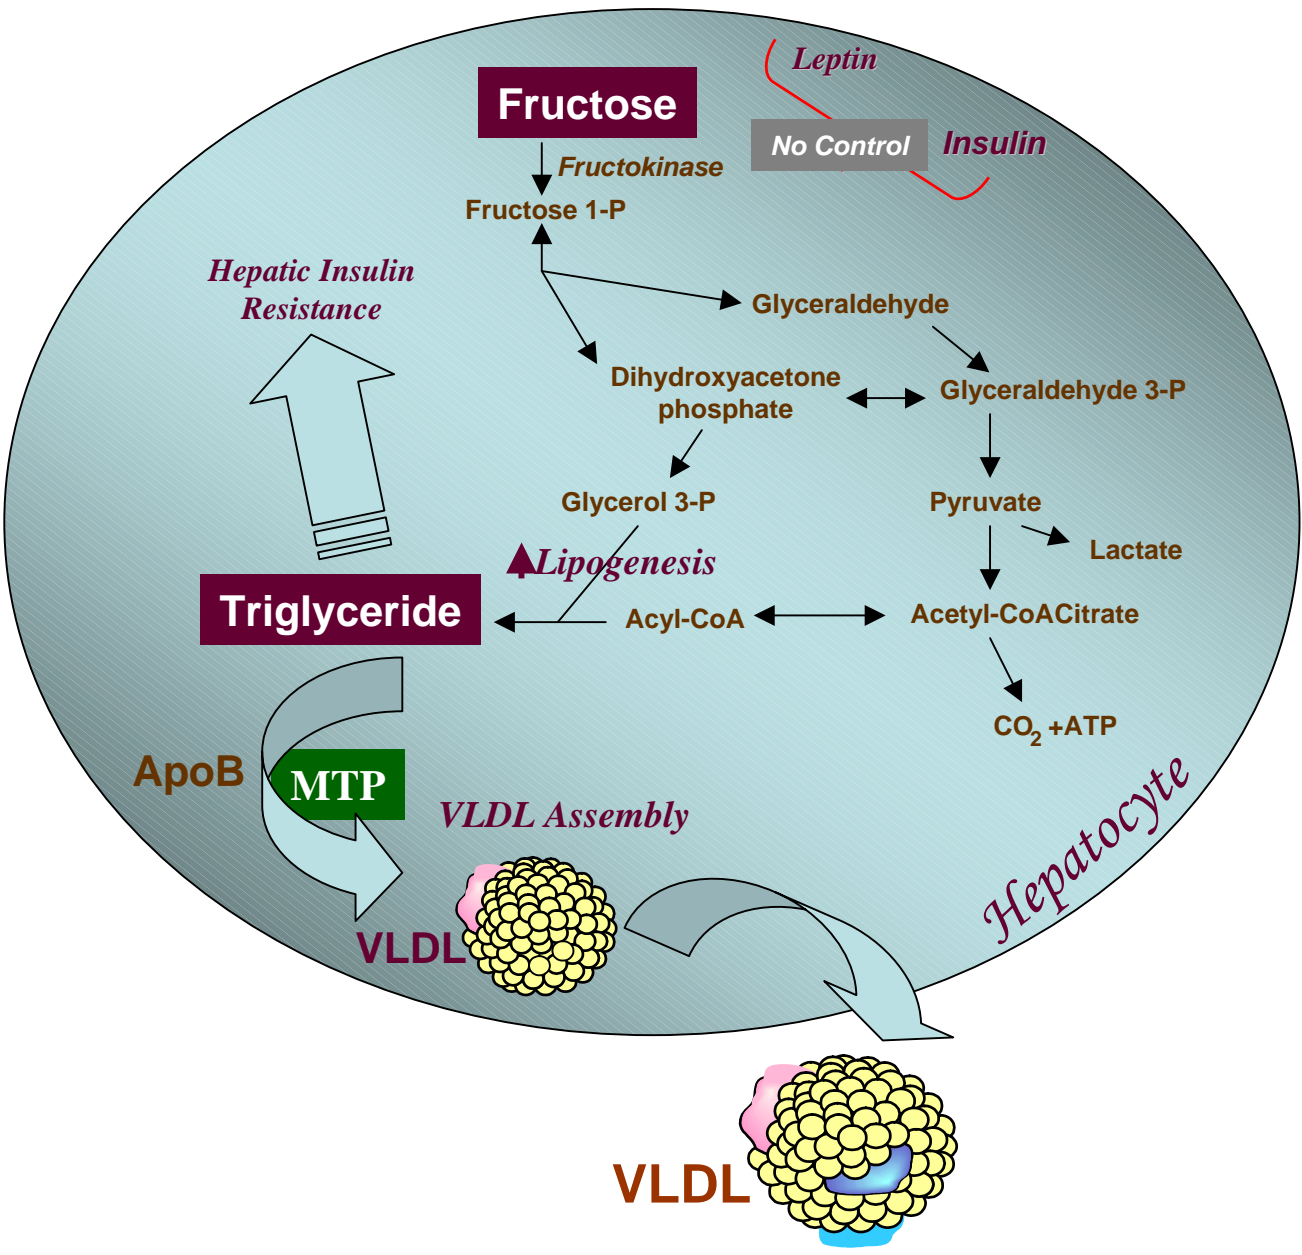

**Fructose**

Fructokinase

Fructose 1-P

No Control

Insulin

Hepatic Insulin Resistance

Glyceraldehyde

Dihydroxyacetone phosphate

Glyceraldehyde 3-P

Glycerol 3-P

Pyruvate

Lactate

Lipogenesis

**Triglyceride**

Acyl-CoA

Acetyl-CoA

CO<sub>2</sub> + ATP

ApoB

MTP

VLDL Assembly

VLDL

Hepatocyte

VLDL
